# Supplementary material for: SLICER: A Seamless Gene Deletion Method for Deinococcus radiodurans
Source: PubMed Central journal article supplement (PMC10085245; doi:10.34133/bdr.0009), 2023-03-15
Supplement: bdr.0009.f1.pdf [file bdr.0009.f1.pdf]

## Supplemental Figures

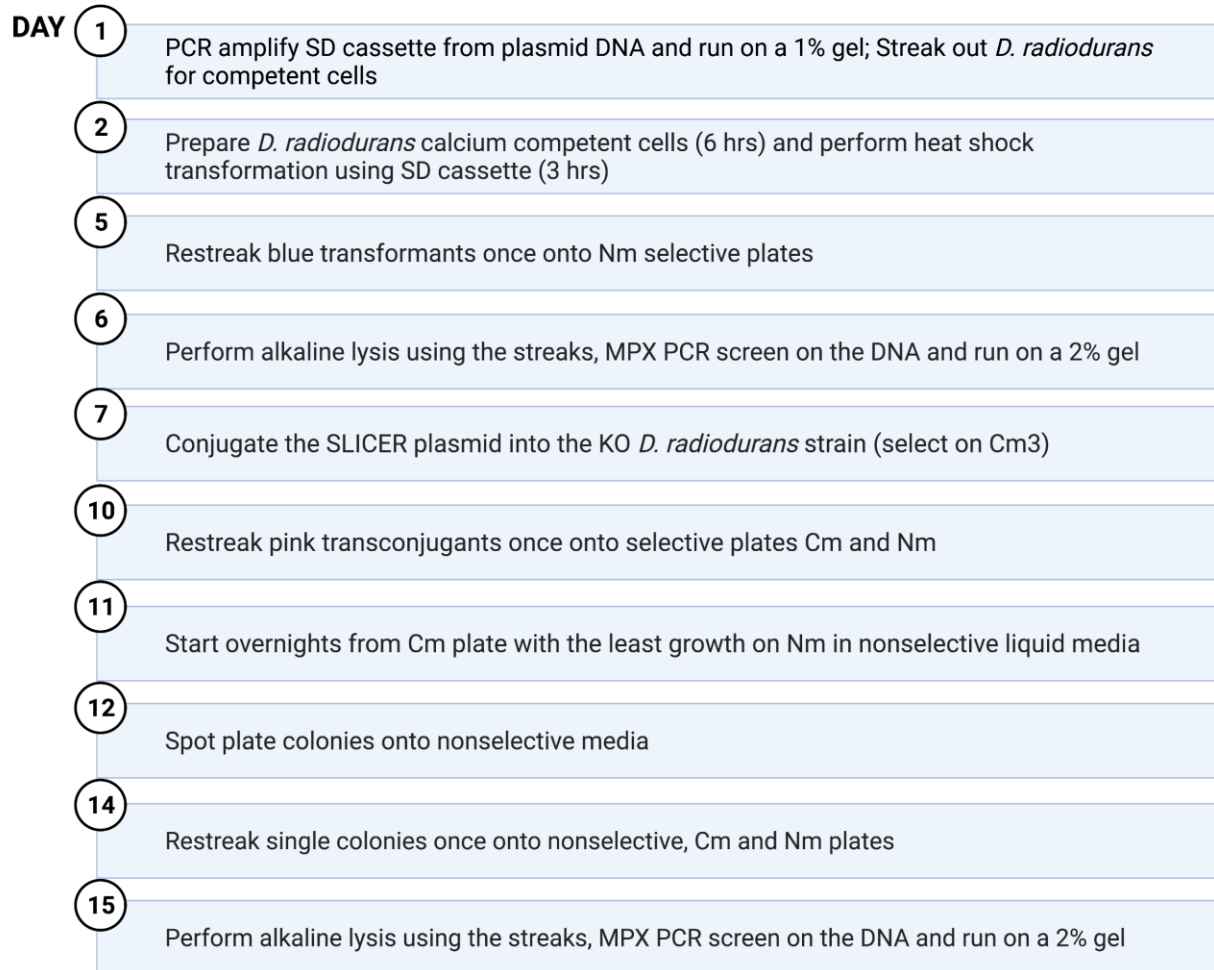

**Figure S1.** Step-by-step SLICER protocol. Laboratory protocol for the SLICER method, which can be used to create a seamless gene deletion in *D. radiodurans* in approximately 2 weeks. Created with BioRender.com.

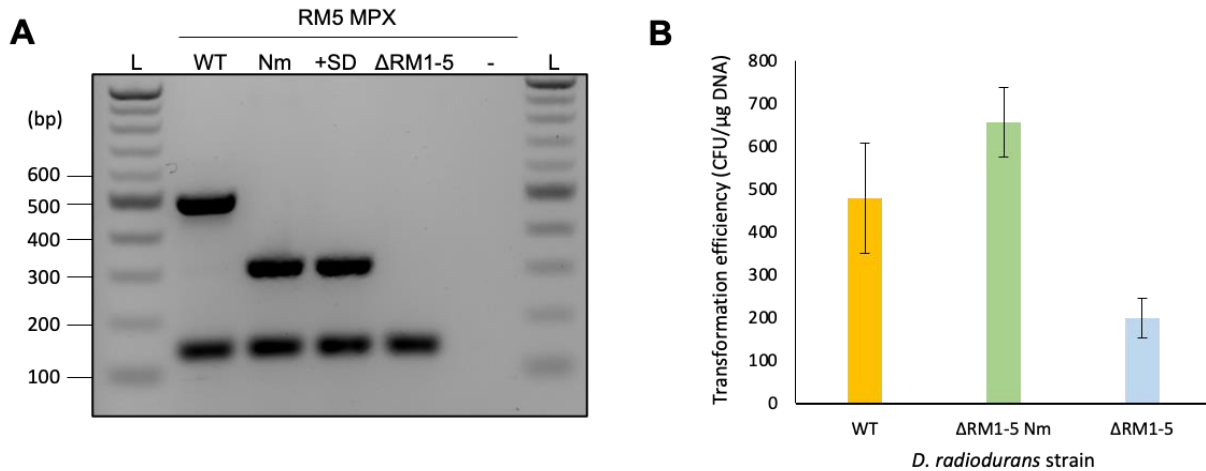

**Figure S2.** Seamless deletion of RM5 using SLICER in *D. radiodurans*. (A) Gel electrophoresis of multiplex PCR analysis (RM5 MPX) of a single *D. radiodurans* colony from each step in the creation of the fifth deletion in the order of: wildtype (WT), following deletion using homologous recombination of a neomycin marker (Nm), following integration of the SD cassette in *D. radiodurans* ΔRM1-4 (+SD), and following conjugation of pSLICER, excision of the SD cassette, and plasmid curing (ΔRM1-5). L, 1 kb plus ladder. (B) Transformation efficiency reported as CFU  $\mu\text{g}^{-1}$  DNA for heat shock transformation of the pRAD1 plasmid into *D. radiodurans* WT, ΔRM1-5 Nm, and ΔRM1-5 strains. Transformants were selected on TGY media supplemented with chloramphenicol ( $3 \mu\text{g mL}^{-1}$ ) and 1225 - 1255 ng of DNA was used for each transformation. The data presented is the mean of three biological replicates. Each biological replicate is the mean transformation efficiency of two technical replicates, except for one instance where a single WT technical replicate was discarded due to contamination. Error bars represent standard error of the mean.

## Supplemental Tables

**Table S1.** *Deinococcus radiodurans* strains created in this study.

| Strain    | Description                                             | Resistance | Reference or Source |
|-----------|---------------------------------------------------------|------------|---------------------|
| ΔRM1      | ΔORF14075                                               | None       | This study          |
| ΔRM1-2    | ΔORF14075 Δ <i>Mrr</i>                                  | None       | This study          |
| ΔRM1-3    | ΔORF14075 Δ <i>Mrr</i> ΔORF15360                        | None       | This study          |
| ΔRM1-4    | ΔORF14075 Δ <i>Mrr</i> ΔORF15360 Δ <i>Mrr2</i>          | None       | This study          |
| ΔRM1-5    | ΔORF14075 Δ <i>Mrr</i> ΔORF15360 Δ <i>Mrr2</i> ΔORF2230 | None       | This study          |
| ΔRM1-5 Nm | ΔORF14075 Δ <i>Mrr</i> ΔORF15360 Δ <i>Mrr2</i> ΔORF2230 | Nm         | This study          |

**Table S2.** List of plasmids used in this study.

| Plasmid  | Description                                                            | Resistance                                                                                                                                                                            | Reference or Source                |
|----------|------------------------------------------------------------------------|---------------------------------------------------------------------------------------------------------------------------------------------------------------------------------------|------------------------------------|
| pBH474   | Suc <sup>s</sup> derivative of pTH474                                  |                                                                                                                                                                                       | <sup>1</sup>                       |
| pDEINO1  | Replicating plasmid with codon-optimized Cm marker                     | Cm ( <i>D. radiodurans</i> , <i>E. coli</i> )<br>Nm ( <i>D. radiodurans</i> , <i>E. coli</i> , <i>S. meliloti</i> )<br>HIS3 ( <i>S. cerevisiae</i> )<br>Ntc ( <i>P. tricornutum</i> ) | <sup>2</sup><br>Addgene ID: 179472 |
| pDEINO3  | Replicating plasmid with Tet marker                                    | Tet and Cm ( <i>D. radiodurans</i> , <i>E. coli</i> )<br>HIS3 ( <i>S. cerevisiae</i> )                                                                                                | <sup>2</sup><br>Addgene ID: 179487 |
| pDEINO4  | Replicating plasmid with Strep marker                                  | Cm ( <i>D. radiodurans</i> , <i>E. coli</i> )<br>Strep ( <i>D. radiodurans</i> )<br>HIS3 ( <i>S. cerevisiae</i> )                                                                     | <sup>2</sup><br>Addgene ID: 179488 |
| pDEINO10 | Nonreplicating plasmid with two 1 kb homology regions flanking ORF2230 | Nm ( <i>D. radiodurans</i> ), Cm ( <i>E. coli</i> ), HIS3 ( <i>S. cerevisiae</i> )                                                                                                    | <sup>2</sup>                       |
| pSLICER  | Replicating SLICER plasmid containing <i>I-SceI</i> endonuclease       | Cm ( <i>D. radiodurans</i> , <i>E. coli</i> )<br>HIS3 ( <i>S. cerevisiae</i> )                                                                                                        | This study<br>Addgene ID: 197288   |
| pSD1     | Non-replicating plasmid containing RM1 SD cassette                     | Nm and Tet ( <i>D. radiodurans</i> , <i>E. coli</i> )<br>Cm ( <i>E. coli</i> )<br>HIS3 ( <i>S. cerevisiae</i> )                                                                       | This study                         |
| pSD2     | Non-replicating plasmid containing RM2 SD cassette                     | Nm ( <i>D. radiodurans</i> , <i>E. coli</i> )<br>Strep ( <i>D. radiodurans</i> )<br>Cm ( <i>E. coli</i> )<br>HIS3 ( <i>S. cerevisiae</i> )                                            | This study                         |
| pSD3     | Non-replicating plasmid containing RM3 SD cassette                     | Nm and Tet ( <i>D. radiodurans</i> , <i>E. coli</i> )                                                                                                                                 | This study                         |

|                 |                                                                           |                                                                                        |                                  |
|-----------------|---------------------------------------------------------------------------|----------------------------------------------------------------------------------------|----------------------------------|
|                 |                                                                           | HIS3 ( <i>S. cerevisiae</i> )                                                          |                                  |
| pSD4            | Non-replicating plasmid containing RM4 SD cassette                        | Nm and Tet ( <i>D. radiodurans</i> , <i>E. coli</i> )<br>HIS3 ( <i>S. cerevisiae</i> ) | This study                       |
| pSD5            | Non-replicating plasmid containing RM5 SD cassette                        | Nm and Tet ( <i>D. radiodurans</i> , <i>E. coli</i> )<br>HIS3 ( <i>S. cerevisiae</i> ) | This study<br>Addgene ID: 197289 |
| pET-24α(+)-lacZ | pET-24α(+) with <i>lacZ</i> under a constitutive promoter                 | Kan ( <i>E. coli</i> )<br>HIS3 ( <i>S. cerevisiae</i> )                                | Pellegrino, unpublished          |
| pRAD1           | General cloning vector for use in <i>E. coli</i> or <i>D. radiodurans</i> | Amp ( <i>E. coli</i> ), Cm ( <i>D. radiodurans</i> )                                   | 3                                |
| pTA-Mob         | Broad-host-range mobilization plasmid                                     | Gm ( <i>E. coli</i> )                                                                  | 4                                |

**Table S3.** List of oligonucleotides used in this study. The bold, underlined sequence in the assembly primers represents the binding portion of the primer, while the remainder of the sequence is the hook (*i.e.*, homology region) to the adjacent fragment. Sequence in red indicates the *I-SceI* recognition site.

| Name                        | Sequence (5' to 3')                                                               | Description                                              |
|-----------------------------|-----------------------------------------------------------------------------------|----------------------------------------------------------|
| pSLICER Assembly Primers    |                                                                                   |                                                          |
| BK1388_F                    | AGTACATCACCGACGAGCAAGGCAAGACGATC<br>TTAATTAAT <b><u>TCGAGCTGGTTGCCCTCGCC</u></b>  | pSLICER assembly primer<br>(split pCC1BAC-yeast #1)      |
| BK1388_R                    | GAAGAGCGTTGATCAATGGCCTGTTCAAAAAC<br>AGTTCTCAT <b><u>TCCGGATCTGACCTTTACCA</u></b>  | pSLICER assembly primer<br>(split pCC1BAC-yeast #1)      |
| BK1389_F                    | GTACGTGAAACGGATGAAGTTGGTAAAGGTCA<br>GATCCGGAT <b><u>AGAGA</u></b> ACTGTTTTTGAACAG | pSLICER assembly primer<br>(split pCC1BAC-yeast #2)      |
| BK1389_R                    | TCGATAGATCTCGAGGCCTCGCGAGCTTGGCG<br>TAATCATGG <b><u>TTTTAAACGGGCTTCGCCCT</u></b>  | pSLICER assembly primer<br>(split pCC1BAC-yeast #2)      |
| BK1390_F                    | GCTCGCCGCAGTCGAGCGACAGGGCGAAGCCC<br>GTTTAAAC <b><u>CATGATTACGCCAAGCTCGC</u></b>   | pSLICER assembly primer<br>(Drad origin)                 |
| BK1945_R                    | TGTCCAGGGCCCTCGGTCTCCATGGCCCTCAG<br>GCCCTCGC <b><u>TTAGCTTCCTTAGCTCCTG</u></b>    | pSLICER assembly primer<br>(Drad origin)                 |
| BK1946_F                    | CCGAGCTTCGACGAGATTTTCAGGAGCTAAGG<br>AAGCTAAAG <b><u>CGAGGGCCTGAGGGCCATG</u></b>   | pSLICER assembly primer<br>(DrCm <sup>R</sup> )          |
| BK1946_R                    | GGCTTGATTTTCAGAATAGGGGCCAATCCAGA<br>ATTACCTCA <b><u>AAAAACCCCGGATTGCC</u></b>     | pSLICER assembly primer<br>(DrCm <sup>R</sup> )          |
| BK1947_F                    | GCAGAAAAAATCCCCCGGTGGCAATCCGGGG<br>GGTTTTTT <b><u>GAGGTAATTCTGGATTGGCC</u></b>    | pSLICER assembly primer<br>( <i>I-SceI</i> endonuclease) |
| BK1947_R                    | CGCTATAATGACCCCGAAGCAGGGTTATGCAG<br>CGGAAGAT <b><u>GAGCAGAGGCTCTCGCTGAT</u></b>   | pSLICER assembly primer<br>( <i>I-SceI</i> endonuclease) |
| BK1948_F                    | TGGCCCTCACCGCCGCTCCATCAGCGAGAGC<br>CTCTGCTC <b><u>ATCTTCCGCTGCATAACCTT</u></b>    | pSLICER assembly primer<br>( <i>oriT</i> )               |
| BK1392_R                    | CGCCAGCCAGCGGCGAGGGCAACCAGCTCGA<br>TTAATTAAG <b><u>ATCGTCTTGCCCTGCTCGT</u></b>    | pSLICER assembly primer<br>( <i>oriT</i> )               |
| pSD1 (RM1) Assembly Primers |                                                                                   |                                                          |

|                             |                                                                                                         |                                                   |
|-----------------------------|---------------------------------------------------------------------------------------------------------|---------------------------------------------------|
| BK1388_F                    | AGTACATCACCGACGAGCAAGGCAAGACGATC<br>TTAATTAAT <u>TCGAGCTGGTTGCCCTCGCC</u>                               | pSD1 assembly primer (split<br>pCC1BAC-yeast #1)  |
| BK1388_R                    | GAAGAGCGTTGATCAATGGCCTGTTCAAAAAC<br>AGTTCTCA <u>TCGGATCTGACCTTTACCA</u>                                 | pSD1 assembly primer (split<br>pCC1BAC-yeast #1)  |
| BK1389_F                    | GTACGTGAAACGGATGAAGTTGGTAAAGGTCA<br>GATCCGGAT <u>GAGAACTGTTTTGAACAG</u>                                 | pSD1 assembly primer (split<br>pCC1BAC-yeast #2)  |
| BK2093_R                    | CACGGCCGCGCTCGGCCTCTCTGGCGGCCTTCT<br>GGCGCT <u>CGGGCTTCGCCCTGTCGCTCG</u>                                | pSD1 assembly primer (split<br>pCC1BAC-yeast #2)  |
| BK2094_F                    | CCAGTAGTGCTCGCCGAGTCGAGCGACAGGG<br>CGAAGCCCC <u>GAGCGCCAGAAGGCCGCCAG</u>                                | pSD1 assembly primer (Tet <sup>R</sup> )          |
| BK2094_R                    | GAGCGCAATGCCCCGATCACCTTGCGGTACCG<br>GGCGAGGC <u>GATCAGACGCTGAGTGCCT</u>                                 | pSD1 assembly primer (Tet <sup>R</sup> )          |
| BK2095_F                    | GCAGGACGCCGATGATTTGAAGCGCACTCAGC<br>GTCTGATC <u>GCCTCGCCCGGTACCGCAAG</u>                                | pSD1 assembly primer<br>(ORF14075 homology #1)    |
| BK2095_R                    | AGGGCAGTTGGAAAGTTGAGGAAAGCAGGGC<br>TGTGTACCAGGTGCCCCGCGACGTTGCGT <u>GTG</u><br><u>CGCAGGAGTGGGCCACA</u> | pSD1 assembly primer<br>(ORF14075 homology #1)    |
| BK2096_F                    | TCCTCAACTTTCCAAGTCCCTCTCCGACTGAC<br>TTTGCTGCT <u>TAGGGATAACAGGGTAATGGGG</u><br><u>TGGGCGAAGAACTCCA</u>  | pSD1 assembly primer (Nm <sup>R</sup> )           |
| BK2096_R                    | TCTCATTTCACTAAATAATAGTGAACGGCAGG<br>TATATGTG <u>AGCTTCACGCTGCCGCAAGC</u>                                | pSD1 assembly primer (Nm <sup>R</sup> )           |
| BK2097_F                    | GCAGCCCTTGCGCCCTGAGTGCTTGCGGCAGC<br>GTGAAGCT <u>CACATATACCTGCCGTTAC</u>                                 | pSD1 assembly primer ( <i>SacB</i> )              |
| BK2097_R                    | AGGGCAGTTGGAAAGTTGAGGAAAGCAGGGC<br>TGTGTACCAGGTGCCCCGCGACGTTGCGT <u>GGC</u><br><u>CATCGGCATTTTCTTTT</u> | pSD1 assembly primer ( <i>SacB</i> )              |
| BK2098_F                    | TGGTACACACGCCTGCTTTCTCAACTTTCCAA<br>CTGCCCTCTCCGACTGACTTTGCTGCT <u>AGCTTG</u><br><u>AGATTCGTAICTGC</u>  | pSD1 assembly primer<br>(ORF14075 homology #2)    |
| BK2098_R                    | CGCTATAATGACCCCGAAGCAGGGTTATGCAG<br>CGGAAGAT <u>CCCAGACCTGCTCCGGCGTG</u>                                | pSD1 assembly primer<br>(ORF14075 homology #2)    |
| BK2099_F                    | CTGAAAAAAGCCCGCATCGGCACGCCGGAGCA<br>GGTCTGGG <u>ATCTTCCGCTGCATAACCCT</u>                                | pSD1 assembly primer ( <i>oriT</i> )              |
| BK1392_R                    | CGCCAGCCAGCGGCGAGGGCAACCAGCTCGA<br>TTAATTAAG <u>ATCGTCTTGCTTGCTCGT</u>                                  | pSD1 assembly primer ( <i>oriT</i> )              |
| pSD2 (RM2) Assembly Primers |                                                                                                         |                                                   |
| BK1388_F                    | AGTACATCACCGACGAGCAAGGCAAGACGATC<br>TTAATTAAT <u>TCGAGCTGGTTGCCCTCGCC</u>                               | pSD2 assembly primer (split<br>pCC1BAC-yeast #1)  |
| BK1388_R                    | GAAGAGCGTTGATCAATGGCCTGTTCAAAAAC<br>AGTTCTCA <u>TCGGATCTGACCTTTACCA</u>                                 | pSD2 assembly primer (split<br>pCC1BAC-yeast #1)  |
| BK1389_F                    | GTACGTGAAACGGATGAAGTTGGTAAAGGTCA<br>GATCCGGAT <u>GAGAACTGTTTTGAACAG</u>                                 | pSD2 assembly primer (split<br>pCC1BAC-yeast #2)  |
| BK2299_R                    | ACAAGCATAAAGCTTGCTCAATCAATCACCGG<br>ATCCCCGG <u>GGGCTTCGCCCTGTCGCTCG</u>                                | pSD2 assembly primer (split<br>pCC1BAC-yeast #2)  |
| BK2300_F                    | CCAGTAGTGCTCGCCGAGTCGAGCGACAGGG<br>CGAAGCCCC <u>CGGGGATCCGGTGATTGAT</u>                                 | pSD2 assembly primer (Spec <sup>R</sup> )         |
| BK2300_R                    | CCAGCGGCTACGGGCGATGTACGAGCAGGAAC<br>TGGGATT <u>CGGATCCGGTGATTGATTGAG</u>                                | pSD2 assembly primer (Spec <sup>R</sup> )         |
| BK2301_F                    | GTTTACAAGCATAAAGCTTGCTCAATCAATCA<br>CCGGATCC <u>GAATCCAGTTCCTGCTCGT</u>                                 | pSD2 assembly primer ( <i>Mrr</i><br>Homology #1) |
| BK2301_R                    | GCTGGAGTTCTTCGCCACCCCA <u>TTACCCTGT</u><br><u>TATCCCTAATTTTTTAAGTTACGCTCT</u>                           | pSD2 assembly primer ( <i>Mrr</i><br>Homology #1) |

|                             |                                                                                                         |                                                                     |
|-----------------------------|---------------------------------------------------------------------------------------------------------|---------------------------------------------------------------------|
| BK2302_F                    | ACAGAGCGTAAACTTAAAAAAT <b>TAGGGATAA</b><br><b>CAGGGTAATGGGGTGGGCGAAGAACTCCA</b>                         | pSD2 assembly primer (Nm <sup>R</sup> )                             |
| BK2302_R                    | TGTGAGCTAGCATTATACCTAGGACTGAGCTA<br>GCTGTCAA <b>AGCTTCACGCTGCCGCAAGC</b>                                | pSD2 assembly primer (Nm <sup>R</sup> )                             |
| BK2303_F                    | GCAGCCCTTGCGCCCTGAGTGCTTGCGGCAGC<br>GTGAAGCT <b>TTGACAGCTAGCTCAGTCCT</b>                                | pSD2 assembly primer ( <i>lacZ</i> )                                |
| BK2303_R                    | GTCTGGACTTACGGCTTTCGTCCCTTCCGCGCA<br>CCCAGCGCCTGTCCCAGCGACGCCCGCT <b>TATAA</b><br><b>ACGCAGAAAGGCCA</b> | pSD2 assembly primer ( <i>lacZ</i> )                                |
| BK2304_F                    | CGCTGGGTGCGCGGAAGGGACGAAAGCCGTA<br>AGTCCAGACAGAGCGTAAACTTAAAAAAT <b>GCT</b><br><b>CGCTGACAGGGCGGTT</b>  | pSD2 assembly primer ( <i>Mrr</i><br>Homology #2)                   |
| BK2304_R                    | CGCTATAATGACCCCCGAAGCAGGGTTATGCAG<br>CGGAAGAT <b>CGGCAGTTCACGTTGACA</b>                                 | pSD2 assembly primer ( <i>Mrr</i><br>Homology #2)                   |
| BK2305_F                    | CACCGCCACATCGCCGAGTTGTGCAACGTGG<br>AACTGCCG <b>ATCTTCCGCTGCATAACCCT</b>                                 | pSD2 assembly primer ( <i>oriT</i> )                                |
| BK1392_R                    | CGCCAGCCAGCGGCGAGGGCAACCAGCTCGA<br>TTAATTA <b>AGATCGTCTTGCTTGCCTGCTCGT</b>                              | pSD2 assembly primer ( <i>oriT</i> )                                |
| pSD3 (RM3) Assembly Primers |                                                                                                         |                                                                     |
| BK2390_F                    | CAAAGGCCTGCACGTCCTCAAAGAGCAGCGGC<br>TGAATCAC <b>ATCTTCCGCTGCATAACCCT</b>                                | pSD3 assembly primer ( <i>oriT</i> +<br>split pCC1BAC-yeast #1)     |
| BK2092_R                    | GAAGAGCGTTGATCAATGGCCTGTTCAAAAAC<br>AGTTCTCA <b>TCCGGATCTGACCTTTACCA</b>                                | pSD3 assembly primer ( <i>oriT</i> +<br>split pCC1BAC-yeast #1)     |
| BK2093_F                    | GTACGTGAAACGGATGAAGTTGGTAAAGGTCA<br>GATCCGGAT <b>TGAGAACTGTTTTGAACAG</b>                                | pSD3 assembly primer (split<br>pCC1BAC-yeast #2 +Tet <sup>R</sup> ) |
| BK2391_R                    | GGGCCTACATAAAAGGATCAGTCCTCGGAAAC<br>TTCTGCC <b>CGATCAGACGCTGAGTGCGCT</b>                                | pSD3 assembly primer (split<br>pCC1BAC-yeast #2 +Tet <sup>R</sup> ) |
| BK2392_F                    | GCAGGACGCCGATGATTTGAAGCGCACTCAGC<br>GTCTGAT <b>CGGGCAGAAGTTTCCGAGGAC</b>                                | pSD3 assembly primer<br>(ORF15360 Homology #1)                      |
| BK2392_R                    | GCTGGAGTTCTTCGCCACCC <b>ATTACCCTGT</b><br><b>TATCCCTACAATGCCATTTATGTTTTC</b>                            | pSD3 assembly primer<br>(ORF15360 Homology #1)                      |
| BK2393_F                    | CAGAAAACATAAATGGCATTGT <b>TAGGGATAA</b><br><b>CAGGGTAATGGGGTGGGCGAAGAACTCCA</b>                         | pSD3 assembly primer (Nm <sup>R</sup> +<br><i>lacZ</i> )            |
| BK2395_R                    | TGGCACTTCGGCACTAGCTGCGTCAGCCTTGTT<br>TATTGACTCCGGCACGACTTGGAGACGT <b>TATAA</b><br><b>ACGCAGAAAGGCCA</b> | pSD3 assembly primer (Nm <sup>R</sup> +<br><i>lacZ</i> )            |
| BK2394_F                    | GTCAATAAACAAGGCTGACGCAGCTAGTGCCG<br>AAGTGCCAGAAAACATAAATGGCATTGT <b>GCCC</b><br><b>CCTCGACCTTGCCCGT</b> | pSD3 assembly primer<br>(ORF15360 Homology #2)                      |
| BK2394_R                    | CGCTATAATGACCCCCGAAGCAGGGTTATGCAG<br>CGGAAGAT <b>GTGATTCAGCCGCTGCTCTT</b>                               | pSD3 assembly primer<br>(ORF15360 Homology #2)                      |
| pSD4 (RM4) Assembly Primers |                                                                                                         |                                                                     |
| BK2408_F                    | GTTCGACCAAATGCGCCCCCACCCGCAGCG<br>TCAGGTCG <b>ATCTTCCGCTGCATAACCCT</b>                                  | pSD4 assembly primer ( <i>oriT</i> +<br>split pCC1BAC-yeast #1)     |
| BK2092_R                    | GAAGAGCGTTGATCAATGGCCTGTTCAAAAAC<br>AGTTCTCA <b>TCCGGATCTGACCTTTACCA</b>                                | pSD4 assembly primer ( <i>oriT</i> +<br>split pCC1BAC-yeast #1)     |
| BK2093_F                    | GTACGTGAAACGGATGAAGTTGGTAAAGGTCA<br>GATCCGGAT <b>TGAGAACTGTTTTGAACAG</b>                                | pSD4 assembly primer (split<br>pCC1BAC-yeast #2 +Tet <sup>R</sup> ) |
| BK2409_R                    | GCACACCTGGTCGGCGCCGGGCGACAGAGG<br>GCGGCAGT <b>GATCAGACGCTGAGTGCGCT</b>                                  | pSD4 assembly primer (split<br>pCC1BAC-yeast #2 +Tet <sup>R</sup> ) |
| BK2410_F                    | GCAGGACGCCGATGATTTGAAGCGCACTCAGC<br>GTCTGATC <b>ACTGCCGCCCTCTGTGCGCC</b>                                | pSD4 assembly primer ( <i>Mrr2</i><br>Homology #1)                  |

|                                          |                                                                                                  |                                                                     |
|------------------------------------------|--------------------------------------------------------------------------------------------------|---------------------------------------------------------------------|
| BK2410_R                                 | GCTGGAGTTCTTCGCCACCCCA <b>ATTACCCTGT<br/>TATCCCTA</b> <u>TCGCCACCTGATGATCGAG</u>                 | pSD4 assembly primer ( <i>Mrr2</i><br>Homology #1)                  |
| BK2411_F                                 | TACTCGATCATCAGGTGGGCGA <b>TAGGGATAA<br/>CAGGGTAAT</b> <u>TGGGGTGGGCGAAGAACTCCA</u>               | pSD4 assembly primer ( <i>Nm<sup>R</sup></i> +<br><i>lacZ</i> )     |
| BK2413_R                                 | TACGGCGTGGGCGTGCTGACCCGCGAGACCTA<br>CCAGATTCGCCGCTTAGACCGGATTAT <b>TATA<br/>AACGCAGAAAGGCCCA</b> | pSD4 assembly primer ( <i>Nm<sup>R</sup></i> +<br><i>lacZ</i> )     |
| BK2412_F                                 | GAATCTGGTAGGTCTCGCGGGTCAGCACGCC<br>ACGCCGTA <b>CTCGATCATCAGGTGGGCGAAATT<br/>CGGCCAGTCGCCGTA</b>  | pSD4 assembly primer ( <i>Mrr2</i><br>Homology #2)                  |
| BK2412_R                                 | CGCTATAATGACCCCGAAGCAGGGTTATGCAG<br>CGGAAGAT <b>CGACCTGACGCTGCGGGTGG</b>                         | pSD4 assembly primer ( <i>Mrr2</i><br>Homology #2)                  |
| pSD5 (RM5) Assembly Primers              |                                                                                                  |                                                                     |
| BK1388_F                                 | AGTACATCACCGACGAGCAAGGCAAGACGATC<br>TTAATTAAT <b>TCGAGCTGGTTGCCCTCGCC</b>                        | pSD5 assembly primer (split<br>pCC1BAC-yeast #1)                    |
| BK1388_R                                 | GAAGAGCGTTGATCAATGGCCTGTTCAAAAAC<br>AGTTCTCA <b>TCGGGATCTGACCTTTACCA</b>                         | pSD5 assembly primer (split<br>pCC1BAC-yeast #1)                    |
| BK2093_F                                 | GTACGTGAAACGGATGAAGTTGGTAAAGGTCA<br>GATCCGGAT <b>AGAGAACTGTTTTTGAACAG</b>                        | pSD5 assembly primer (split<br>pCC1BAC-yeast #2 +Tet <sup>R</sup> ) |
| BK2403_R                                 | GAAGTCCAGACCCCGCAGGCGAGCATGTACGC<br>CTGGGCG <b>GATCAGACGCTGAGTGCCT</b>                           | pSD5 assembly primer (split<br>pCC1BAC-yeast #2 +Tet <sup>R</sup> ) |
| BK2404_F                                 | GCAGGACGCCGATGATTTGAAGCGCACTCAGC<br>GTCTGATC <b>GCGCCAGGCGTACATGCTC</b>                          | pSD5 assembly primer (ORF2230<br>Homology #1)                       |
| BK2404_R                                 | GCTGGAGTTCTTCGCCACCCCA <b>ATTACCCTGT<br/>TATCCCTA</b> <u>GAACCTCTTCAGAGTACGGC</u>                | pSD5 assembly primer (ORF2230<br>Homology #1)                       |
| BK2405_F                                 | AAGCCGTA <b>CTCTGAAGAGGTTCTAGGGATAA<br/>CAGGGTAAT</b> <u>TGGGGTGGGCGAAGAACTCCA</u>               | pSD5 assembly primer ( <i>Nm<sup>R</sup></i> +<br><i>lacZ</i> )     |
| BK2407_R                                 | TTACTCTCGGGCCATGTGGGCTTCTCAGCGTGC<br>TTCTCGGTTCCCGGCAGTGTCTTTT <b>CTATAAA<br/>CGCAGAAAGGCCCA</b> | pSD5 assembly primer ( <i>Nm<sup>R</sup></i> +<br><i>lacZ</i> )     |
| BK2406_F                                 | CGAGGAAGCACGCTGAGAAGCCCACATGGCCC<br>GAGTGTAAGCCGTA <b>CTCTGAAGAGGTTACAC<br/>CGAAAGCGGGCACCCA</b> | pSD5 assembly primer (ORF2230<br>Homology #2)                       |
| BK2406_R                                 | CGCTATAATGACCCCGAAGCAGGGTTATGCAG<br>CGGAAGAT <b>CGTGAGCACCATTTTCATCC</b>                         | pSD5 assembly primer (ORF2230<br>Homology #2)                       |
| BK2550_F                                 | GCCCGCAAACCACAGGATGAAAATGGTGCTCA<br>CG <b>ATCTTCCGCTGCATAACCCTGCTTCG</b>                         | pSD5 assembly primer ( <i>oriT</i> )                                |
| BK2099_R                                 | CGCCAGCCAGCGGCGAGGGCAACCAGCTCGA<br>TTAATTAAG <b>GATCGTCTTGCTTGCTCGT</b>                          | pSD5 assembly primer ( <i>oriT</i> )                                |
| Seamless Deletion Cassette Amplification |                                                                                                  |                                                                     |
| BK1965_F                                 | CCGGTACCGCAAGGTGAT                                                                               | RM1                                                                 |
| BK1965_R                                 | GGGTCGGTGTCCATCTCTT                                                                              | RM1                                                                 |
| BK1964_F                                 | CCCAGTTCCTGCTCGTACAT                                                                             | RM2                                                                 |
| BK1964_R                                 | AGTTCACGTTGCACA <b>ACTC</b>                                                                      | RM2                                                                 |
| BK1966_F                                 | GCAGAAGTTTCCGAGGACTG                                                                             | RM3                                                                 |
| BK1966_R                                 | GCTGCTCTTTGAGGACGTG                                                                              | RM3                                                                 |
| BK2378_F                                 | GGTGTGCAGCTCGTCTATGA                                                                             | RM4                                                                 |
| BK2378_R                                 | CGCATTTGGT <b>CGAACAGC</b>                                                                       | RM4                                                                 |
| BK1963_F                                 | GCCAGGCGTACATGCTC                                                                                | RM5                                                                 |
| BK1963_R                                 | TGAGCACCATTTTCATCCTG                                                                             | RM5                                                                 |



| Seamless Deletion Multiplex Primers |                        |                              |
|-------------------------------------|------------------------|------------------------------|
| BK2451_F                            | GAACGGGTGCAAAATCAAGAC  | Drad gDNA control – 150 bp   |
| BK2451_R                            | CCGCGTCACCGAGTACAT     | Drad gDNA control – 150 bp   |
| BK2005_F                            | ACGACCATCACACCACTGAA   | Plasmid backbone – 645 bp    |
| BK2005_R                            | CATGACCAGCGTTTATGCAC   | Plasmid backbone – 645 bp    |
| BK2000_F                            | CGAAACGATCCTCATCCTGT   | Nm marker – 311 bp           |
| BK2000_R                            | AGGAAGCGGAACACGTAGAA   | Nm marker – 311 bp           |
| BK2003_F                            | GGCCCACTTCATCACAGAGT   | RM1 (ORF14075) – 509 bp      |
| BK2003_R                            | CCGAACAGGTCCTGGAAGTA   | RM1 (ORF14075) – 509 bp      |
| BK2216_F                            | CCTGACCGAAAGAGAGTTCG   | RM2 ( <i>Mrr</i> ) – 508 bp  |
| BK2216_R                            | GTAGCGGGAGGTCGTCATAA   | RM2 ( <i>Mrr</i> ) – 508 bp  |
| BK2004_F                            | GCTGGTAAATGCCCTTCGTA   | RM3 (ORF15360) – 510 bp      |
| BK2004_R                            | TCTACGCCGACTTCCTGTTC   | RM3 (ORF15360) – 510 bp      |
| BK2450_F                            | CTGAACCCGACGTAAGTATGAT | RM4 ( <i>Mrr2</i> ) – 460 bp |
| BK2450_R                            | TTCAGACCATTCCGGCTTAC   | RM4 ( <i>Mrr2</i> ) – 460 bp |
| BK2002_F                            | GAAGAAGTGCCTGAGCGGTA   | RM5 (ORF2230)                |
| BK2002_R                            | GTCCATGCTGCTCTGAAACA   | RM5 (ORF2230)                |

## Supplemental Methods

**CaCl<sub>2</sub> transformation of WT, ΔRM1-5 Nm, and ΔRM1-5 *D. radiodurans* strains.** *For competent cells:* Competent cells were prepared as described in the methods of the main text, with the following modification: following inoculation, 50 mL cultures of *D. radiodurans* were grown overnight at 30°C for at least 9 doublings to reach an OD<sub>600</sub> of 0.2. *For transformation:* Transformation was performed as described in the methods of the main text, with the following modifications: 100 μL of the transformation mixture was plated on TGY media with chloramphenicol 3 μg mL<sup>-1</sup>. Colonies were counted manually following a 5-day incubation at 30°C.

**Multiplex PCR analysis of *D. radiodurans* for RM5.** Multiplex PCR was performed as described in the methods of the main text, with the following modifications. Dimethyl sulfoxide (DMSO) was omitted, and the number of cycles was decreased to 25. Gel electrophoresis was used to visualize 5 μL of the PCR product on a 2% agarose gel.

## References

1. House, B. L., Mortimer, M. W. & Kahn, M. L. New recombination methods for *Sinorhizobium meliloti* genetics. *Appl. Environ. Microbiol.* (2004). doi:10.1128/AEM.70.5.2806-2815.2004
2. Brumwell, S. L., Van Belois, K. D., Giguere, D. J., Edgell, D. R. & Karas, B. J. Conjugation-Based Genome Engineering in *Deinococcus radiodurans*. *ACS Synth. Biol.* **11**, (2022).
3. Meima, R. & Lidstrom, M. E. Characterization of the minimal replicon of a cryptic *Deinococcus radiodurans* SARK plasmid and development of versatile *Escherichia coli*-*D. radiodurans* shuttle vectors. *Appl. Environ. Microbiol.* **66**, 3856–3867 (2000).
4. Strand, T. A., Lale, R., Degnes, K. F., Lando, M. & Valla, S. A New and Improved Host-Independent Plasmid System for RK2-Based Conjugal Transfer. *PLoS One* **9**, e90372 (2014).
